# Supplementary material for: Time series expression pattern of key genes reveals the molecular process of esophageal cancer
Source: Oxford University Press journal article supplement (doi:10.1042/bsr20191985), 2020-02-01
Supplement: bsr-2019-1985_supp.pdf [file bsr-2019-1985_supp.pdf]

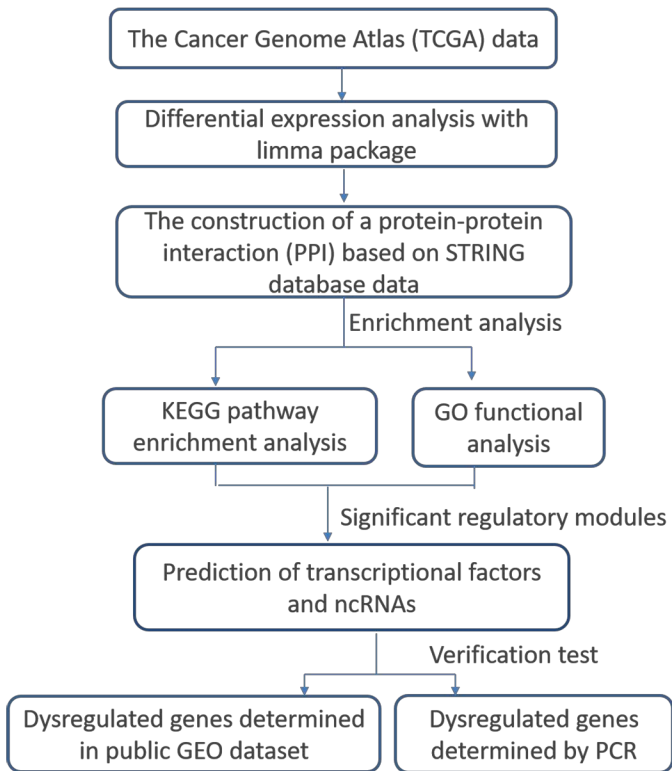

**Supplementary figure 1 Flow chart of this study.**
